# Supplementary material
Source: Springer Nature journal article supplement (https://www.springermedizin.de/resource/supplementary/13045_2013_351_MOESM6_ESM.pdf/9661190)

# Diagnostic/prognostic flowchart for evaluation of TP53 functionality

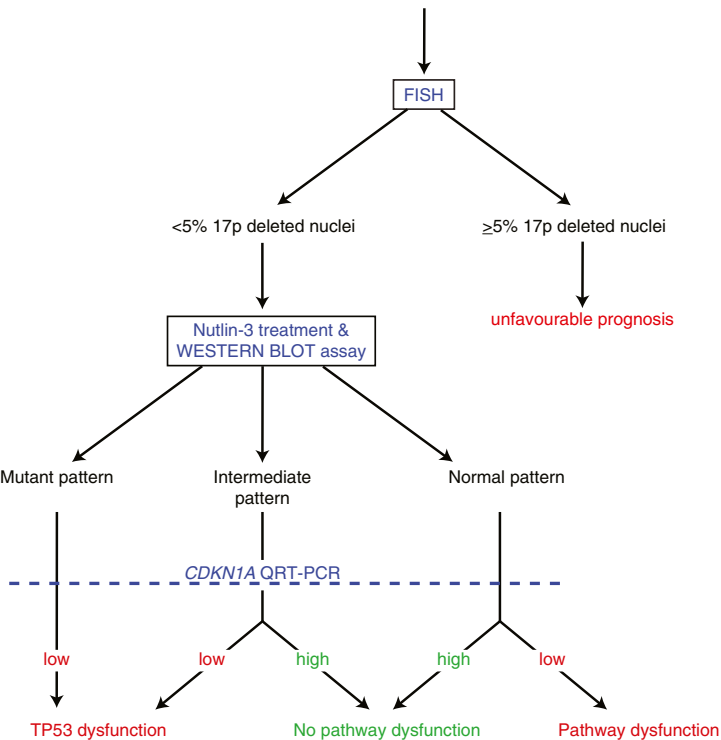

Supplement: MOESM6 [file 9661190]
